# Supplementary material for: Statistical Analyses Support Power Law Distributions Found in Neuronal Avalanches
Source: PLOS journal article supplement (doi:10.1371/journal.pone.0019779), 2011-05-26
Supplement: S7 (10.1371/journal.pone.0019779.s007) [file journal.pone.0019779.s007]

|                             | Power law vs. lognormal       | Power law vs. gamma           |
|-----------------------------|-------------------------------|-------------------------------|
| <b>In vitro</b>             | $8.0 \pm 11.8^{\text{n.s.}}$  | $38.5 \pm 15.8^{\text{n.s.}}$ |
|                             | $225.6 \pm 21.9^{***}$        | $371.1 \pm 40.4^{***}$        |
|                             | $202.8 \pm 20.2^{***}$        | $436.4 \pm 26.1^{***}$        |
|                             | $74.5 \pm 9.5^{***}$          | $136.2 \pm 14.7^{***}$        |
|                             | $69.3 \pm 11.6^{***}$         | $159.2 \pm 16.8^{***}$        |
|                             | $83.6 \pm 12.5^{***}$         | $190.9 \pm 22.5^{***}$        |
|                             | $-3.2 \pm 11.1^{\text{n.s.}}$ | $-5.4 \pm 15.4^{\text{n.s.}}$ |
| <b>In vivo (anesthesia)</b> | $-4.7 \pm 7.4^{\text{n.s.}}$  | $1.2 \pm 10.0^{\text{n.s.}}$  |
|                             | $116.8 \pm 8.3^{***}$         | $186.0 \pm 14.3^{***}$        |
|                             | $16.8 \pm 8.2^{\text{n.s.}}$  | $32.8 \pm 12.7^{\text{n.s.}}$ |
|                             | $98.6 \pm 12.1^{***}$         | $156.8 \pm 16.7^{***}$        |
|                             | $41.7 \pm 5.4^{***}$          | $64.4 \pm 7.0^{***}$          |
|                             | $40.8 \pm 12.8^{\text{n.s.}}$ | $75.5 \pm 17.8^{**}$          |
|                             | $10.8 \pm 11.4^{\text{n.s.}}$ | $40.2 \pm 16.0^{\text{n.s.}}$ |
| <b>In vivo (monkey X)</b>   | $21.1 \pm 16.0^{\text{n.s.}}$ | $69.4 \pm 23.1^{\text{n.s.}}$ |
| <b>In vivo (monkey Y)</b>   | $73.7 \pm 6.8^{***}$          | $172.8 \pm 11.0^{***}$        |

LLR values for the comparison of the single-parameter power law with the lognormal and the gamma distribution for all data sets (i.e., 7 data sets recorded in vitro, 7 in vivo under anesthesia, and 2 in vivo in awake monkeys). Reported values are the mean $\pm$ SD for decorrelated sub-sets of the data; the chosen avalanche lags were 4–26 (in vitro), 5–14 (in vivo, anesthesia), and 10 (monkey X and Y).  $p$ -values (Eq. 18, main text) and statistical significance are reported for the sub-set that had the largest  $p$ -value; \*\*  $p < 0.001$ , \*\*\*  $p < 0.0001$ , n.s. not significant ( $p \geq 0.01$ ).
